# Supplementary material
Source: MDPI journal article supplement (https://www.mdpi.com/2076-3417/9/20/4247)

**Figure S6.** Phylogeny analysis of 16S rRNA clones from the UW ETBE-enrichment subculture S1. The Neighbor-Joining tree was constructed based on phylogenetic distances calculated with Kimura-2 parameter (1126 nucleotide positions included in the analysis) inferred from 74 clone sequences and chosen bacterial strains (high-quality sequences downloaded from RDP). The tree was bootstrapped over 1 000 replicates and the bootstrap values are indicated next to the branches.

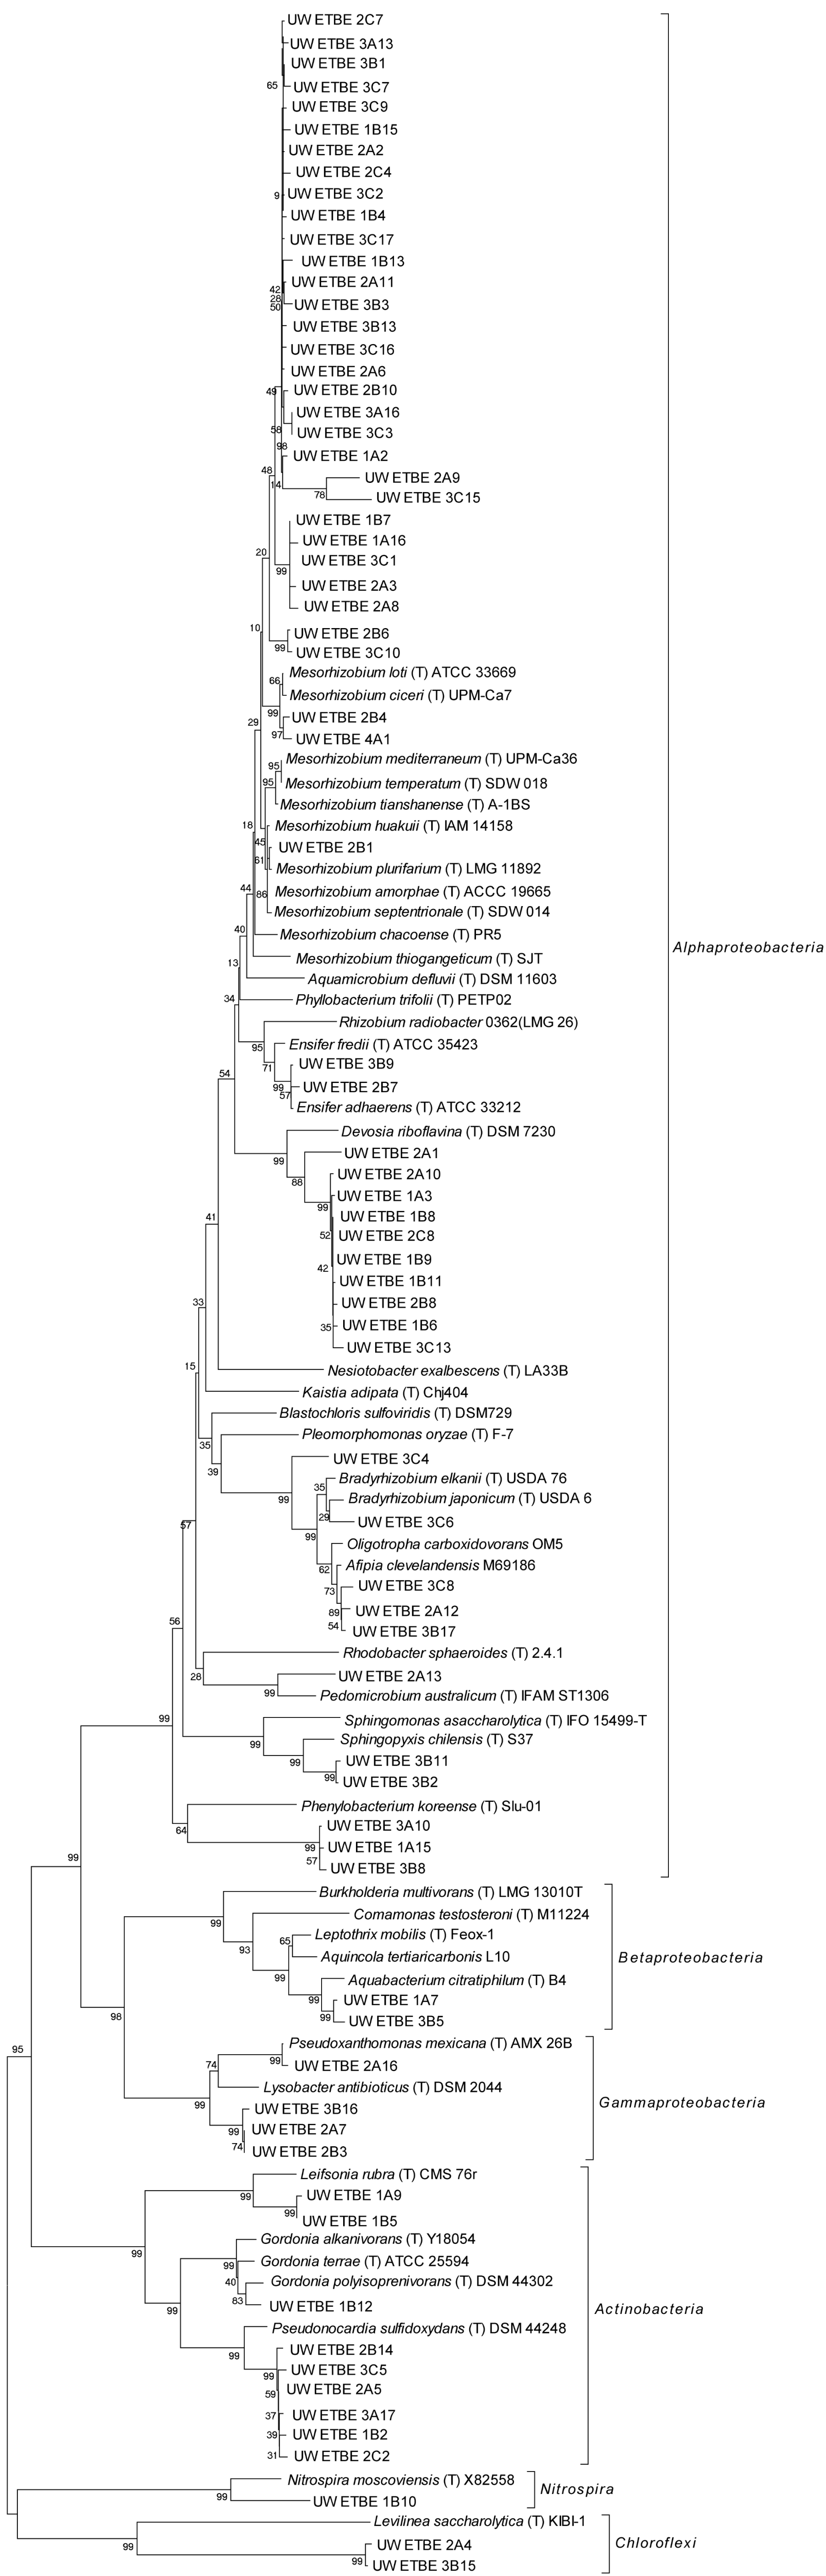

Supplement: s1 [file s1]
