# Supplementary material
Source: MDPI journal article supplement (https://www.mdpi.com/2076-3417/9/20/4247)

**Figure S3.** Analysis of the *rrs* gene diversity in UW and PW water and ETBE-enrichment subcultures based on cloning-sequencing. The graphs show an increase of the number of detected OTUs (97% sequence identity; in red) and number of estimated OTUs (with Chao1; in black) with the number of sequenced clones (based on 100 randomisations).

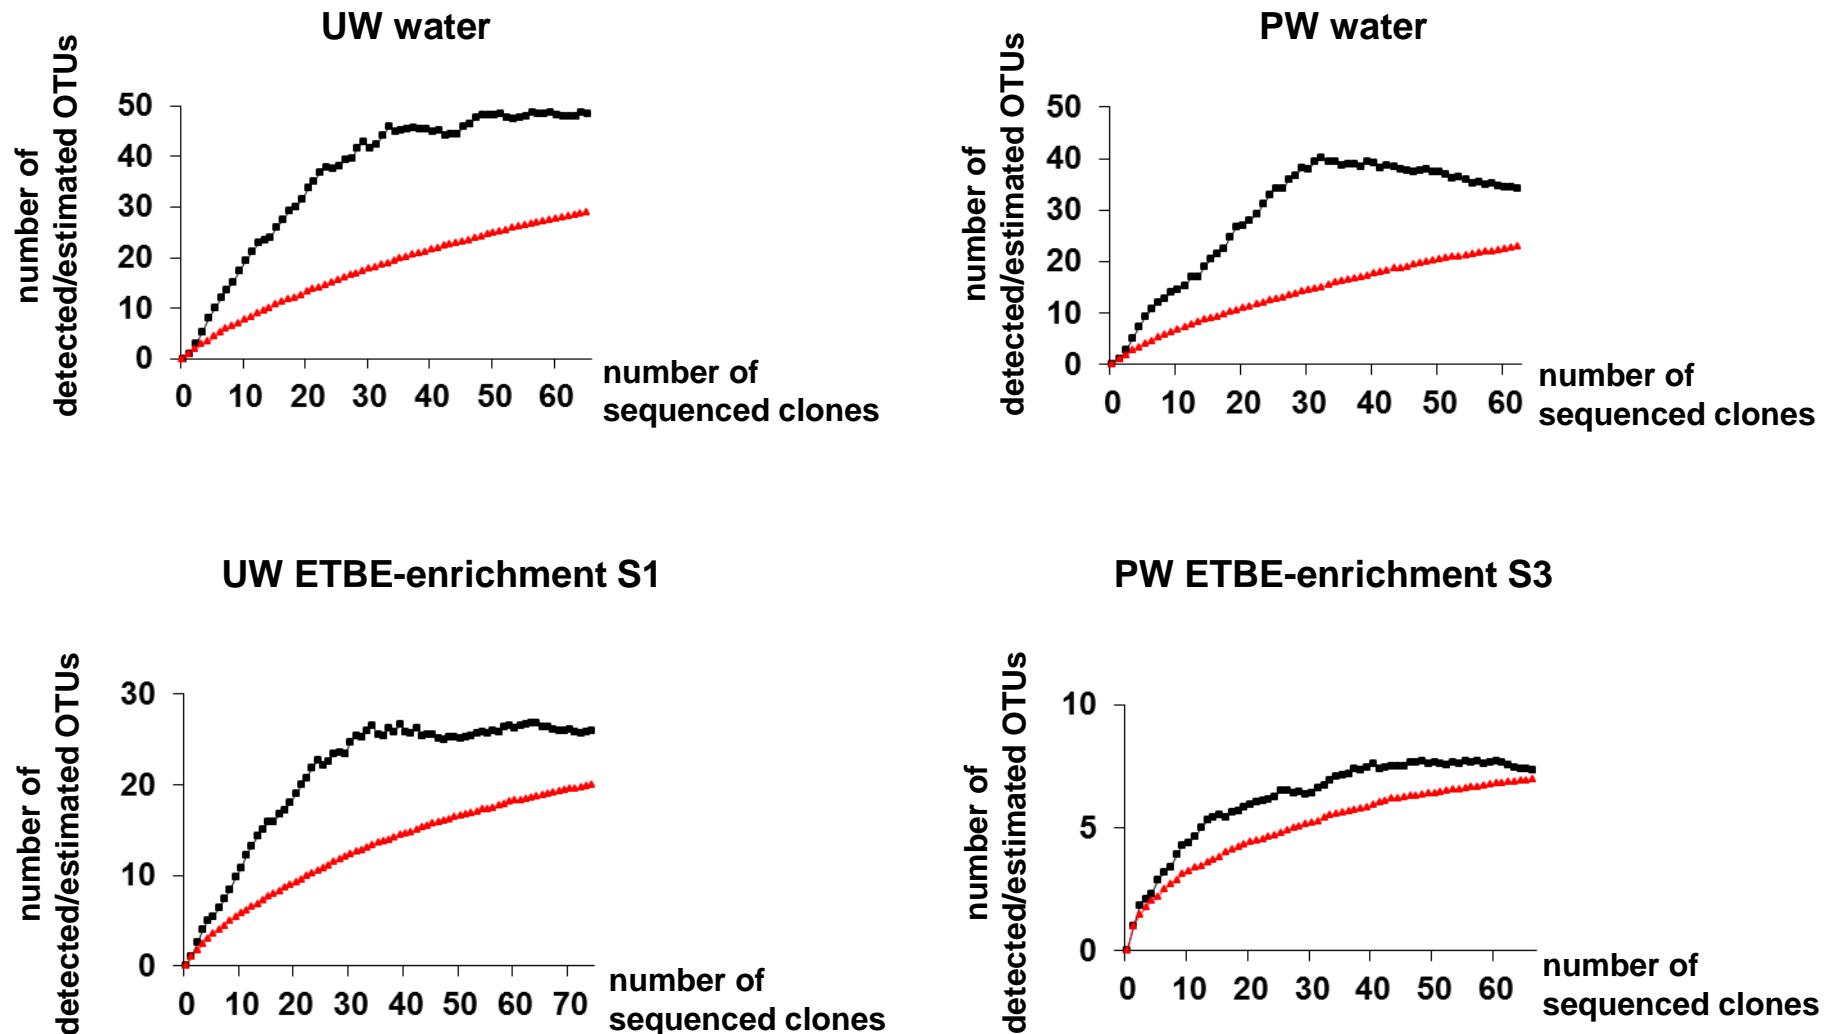

Supplement: s1 [file s1]
