# Supplementary material
Source: MDPI journal article supplement (https://www.mdpi.com/2076-3417/9/20/4247)
Supplement: s1 [file s1]

**Figure S2.** Microarray comparisons of bacterial communities between PW and UP water (**A**), PW water and PW ETBE-enrichments (**B**), UP water and UP ETBE-enrichments (**C**), and PW ETBE-enrichments and UW ETBE-enrichments (**D**). The probes whose signals cumulatively contributed to up to 50% differences in bacterial community composition between each pair of compared groups according to SIMPER and statistically differed between the two groups according to Wilcoxon rank sum tests ( $P < 0.05$ ), are shown together with their targets. The probe signal intensities are indicated by a heatmap.

**A**

| Taxonomical affiliation | Probe target                                                                                                       | Probe            | PW_VI/08 | PW_XI/08 | PW_III/09 | PW_IV/09 | UW_VI/08 | UW_XI/08 | UW_III/09 | UW_IV/09 |
|-------------------------|--------------------------------------------------------------------------------------------------------------------|------------------|----------|----------|-----------|----------|----------|----------|-----------|----------|
| Alphaproteobacteria     | Rhizobiaceae, Brucellaceae, Bartonella, Phyllobacteriaceae, Blastochloris, Azospirillum irakense and amazonense    | <b>Rzbc1247</b>  | 0,0      | 0,9      | 0,7       | 0,9      | 3,3      | 2,2      | 3,1       | 2,9      |
|                         | Agrobacterium genomospecies G1, G3, G4, and G7, A. rubi, A. larrymoorei, some Rhizobium and some Brevundimonas     | <b>B6-603</b>    | 0,0      | 0,0      | 0,0       | 0,0      | 1,4      | 0,7      | 1,4       | 1,8      |
|                         | Xanthobacter                                                                                                       | <b>Xan</b>       | 0,0      | 0,0      | 0,0       | 0,0      | 2,1      | 1,0      | 1,4       | 1,7      |
| Betaproteobacteria      | Cowdria                                                                                                            | <b>Cow1</b>      | 1,8      | 1,5      | 1,3       | 1,3      | 3,5      | 2,1      | 3,1       | 2,9      |
|                         | Azoarcus                                                                                                           | <b>Arcus1</b>    | 1,8      | 1,1      | 4,8       | 4,0      | 0,0      | 0,0      | 0,0       | 0,0      |
|                         | Azoarcus                                                                                                           | <b>Arcus2</b>    | 2,5      | 1,5      | 5,4       | 4,3      | 0,0      | 0,0      | 0,0       | 0,0      |
|                         | few Azoarcus spp.                                                                                                  | <b>AZA463</b>    | 1,8      | 0,7      | 4,5       | 2,9      | 0,0      | 0,0      | 0,0       | 0,0      |
|                         | Most Nitrosospira                                                                                                  | <b>Nit1A</b>     | 2,3      | 3,2      | 4,1       | 3,0      | 0,8      | 0,6      | 1,0       | 0,0      |
|                         | Some Nitrosospira                                                                                                  | <b>Nit1C</b>     | 4,4      | 5,9      | 6,5       | 6,0      | 1,7      | 4,2      | 3,2       | 1,9      |
|                         | Acidovorax cattleyae, Acidovorax citrulli, Acidovorax avenae                                                       | <b>Acave3</b>    | 1,5      | 1,7      | 3,2       | 2,5      | 0,0      | 0,0      | 0,7       | 0,0      |
|                         | Acidovorax cattleyae, Acidovorax citrulli, Acidovorax avenae                                                       | <b>Acave4</b>    | 1,8      | 2,0      | 3,8       | 2,8      | 0,4      | 0,6      | 1,2       | 0,4      |
|                         | acquirer clones affiliated to Acidovorax                                                                           | <b>AcidP2cln</b> | 2,1      | 2,5      | 3,7       | 3,4      | 0,0      | 0,0      | 0,0       | 0,0      |
|                         | acquirer clones affiliated to Polaromonas; Polaromonas naphthalenivorans; Polaromonas hydrogenivorans              | <b>Polarcln</b>  | 3,2      | 3,2      | 1,7       | 2,6      | 0,0      | 0,0      | 0,0       | 0,0      |
|                         | acquirer clones affiliated to Comamonadaceae                                                                       | <b>Rhodofcln</b> | 1,0      | 1,7      | 3,0       | 2,9      | 0,0      | 0,0      | 0,0       | 0,0      |
|                         | Janthinobacterium agaricidamnorum, Massilia timonae, Massilia aerilata, Massilia plicata                           | <b>Janaga2</b>   | 0,0      | 0,0      | 0,0       | 0,0      | 0,6      | 0,2      | 3,1       | 2,9      |
|                         | Janthinobacterium agaricidamnorum, Massilia timonae, Massilia aerilata, Massilia plicata                           | <b>Janaga3</b>   | 0,0      | 0,0      | 0,0       | 0,0      | 1,1      | 0,7      | 4,2       | 4,4      |
|                         | acquirer clones affiliated to Oxalobacteraceae                                                                     | <b>Dugacln</b>   | 0,0      | 0,0      | 0,0       | 0,0      | 0,6      | 1,6      | 3,4       | 3,4      |
|                         | Herbaspirillum huttiense, Herbaspirillum putei, Herbaspirillum magnetovibrio                                       | <b>Hefri4</b>    | 0,0      | 0,0      | 0,0       | 0,0      | 0,4      | 1,1      | 2,1       | 1,4      |
| Gammaproteobacteria     | Ralstonia solanacearum, Ralstonia mannitolilytica                                                                  | <b>Rasol1</b>    | 2,0      | 2,7      | 1,6       | 1,4      | 0,0      | 0,0      | 0,0       | 0,0      |
|                         | acquirer clones affiliated to Cupriavidus; several Cupriavidus spp., Ralstonia spp., Wautersia spp.                | <b>Ralstcln2</b> | 0,0      | 0,0      | 0,0       | 0,0      | 1,2      | 2,2      | 2,8       | 1,9      |
|                         | Pseudomonas                                                                                                        | <b>PseuD</b>     | 0,0      | 0,0      | 0,0       | 0,0      | 1,1      | 1,2      | 3,4       | 1,6      |
|                         | Eikenella corrodens, Neisseria flavescens                                                                          | <b>Eikcor2</b>   | 3,1      | 3,5      | 3,2       | 2,5      | 0,9      | 1,7      | 1,9       | 1,2      |
| Deltaproteobacteria     | Moraxella                                                                                                          | <b>Mor1</b>      | 2,0      | 1,5      | 1,9       | 1,8      | 0,0      | 0,5      | 0,8       | 0,0      |
|                         | Desulfobacterium                                                                                                   | <b>DVLVT222f</b> | 2,7      | 4,0      | 1,8       | 1,8      | 0,0      | 0,0      | 0,0       | 0,0      |
|                         | Desulfobacterium                                                                                                   | <b>221</b>       | 2,0      | 2,4      | 1,1       | 1,2      | 0,0      | 0,0      | 0,0       | 0,0      |
| Epsilonproteobacteria   | Myxococcus and Coralloccoccus                                                                                      | <b>MyxCor1</b>   | 1,5      | 1,9      | 1,1       | 1,2      | 0,2      | 0,4      | 0,0       | 0,0      |
|                         | Sulfuricurvum                                                                                                      | <b>Epsi3</b>     | 1,5      | 1,8      | 0,6       | 1,2      | 0,0      | 0,0      | 0,0       | 0,0      |
| Cyanobacteria           | acquirer clones affiliated to Syntrophaceae; Syntrophus gentianae, Syntrophus buswellii, Syntrophus aciditrophicus | <b>Syncln1</b>   | 2,6      | 2,7      | 1,5       | 2,0      | 0,0      | 0,0      | 0,0       | 0,0      |
|                         | Prochlorothrix                                                                                                     | <b>Prochlo1</b>  | 2,5      | 2,4      | 0,9       | 2,8      | 0,0      | 0,8      | 0,0       | 0,5      |
| Firmicutes              | Paenibacillus and Brevibacillus                                                                                    | <b>PeBr</b>      | 2,2      | 2,4      | 0,9       | 1,2      | 0,0      | 0,0      | 0,0       | 0,0      |
|                         | acquirer clones affiliated to Ruminococcaceae                                                                      | <b>acetovcln</b> | 2,0      | 1,1      | 1,7       | 1,8      | 0,0      | 0,0      | 0,0       | 0,0      |
| Actinobacteria          | Frankia                                                                                                            | <b>Frank16</b>   | 1,5      | 1,9      | 0,9       | 0,8      | 0,0      | 0,2      | 0,0       | 0,0      |
|                         | Nitrospira                                                                                                         | <b>NSR1156</b>   | 0,0      | 0,0      | 0,0       | 0,0      | 2,5      | 0,9      | 1,1       | 1,5      |
| Nitrospira              | Nitrospira                                                                                                         | <b>NSR826</b>    | 0,0      | 0,0      | 0,0       | 0,0      | 2,4      | 1,2      | 1,2       | 2,1      |
|                         | acquirer clones affiliated to Treponema                                                                            | <b>trepcln</b>   | 4,8      | 4,7      | 4,4       | 5,1      | 0,0      | 0,0      | 0,0       | 0,0      |
| Spirochaetes            | acquirer clones affiliated to Treponema                                                                            | <b>Varcln3</b>   | 1,9      | 2,4      | 1,6       | 1,9      | 0,5      | 0,5      | 0,3       | 0,3      |

# B

| Taxonomical affiliation | Probe target                                                                                                       | Probe                                   | PW_ETBE_I1       | PW_ETBE_I2     | PW_ETBE_S1 | PW_ETBE_S2 | PW_ETBE_S3 | PW_06/08 | PW_XI/08 | PW_III/09 | PW_IV/09 |     |
|-------------------------|--------------------------------------------------------------------------------------------------------------------|-----------------------------------------|------------------|----------------|------------|------------|------------|----------|----------|-----------|----------|-----|
| Alphaproteobacteria     | Rhizobiaceae, Brucellaceae, Bartonella, Phyllobacteriaceae, Blastochloris, Azospirillum irakense and amazonense    | <b>Rzbc1247</b>                         | 2,8              | 5,6            | 3,2        | 2,8        | 2,5        | 0,0      | 0,9      | 0,7       | 0,9      |     |
|                         | Bradyrhizobiaceae                                                                                                  | <b>Brady4</b>                           | 3,8              | 5,2            | 5,6        | 3,9        | 5,8        | 2,3      | 2,2      | 0,7       | 2,0      |     |
|                         | Rhodopseudomonas                                                                                                   | <b>Rhodopseud</b>                       | 2,0              | 6,6            | 3,5        | 2,0        | 3,8        | 0,0      | 0,0      | 0,0       | 0,0      |     |
|                         | Xanthobacter                                                                                                       | <b>Xan</b>                              | 2,9              | 4,2            | 2,6        | 2,4        | 1,8        | 0,0      | 0,0      | 0,0       | 0,0      |     |
| Betaproteobacteria      | Betaproteobacteria (excepted Comamonadaceae, Nitrosomonadaceae and Methylophilaceae)                               | <b>BET940</b>                           | 6,2              | 4,4            | 6,3        | 6,4        | 6,1        | 3,8      | 3,5      | 4,2       | 4,2      |     |
|                         | Hydrogenophaga flava, pseudoflava and taeniospiralis                                                               | <b>HyMa2</b>                            | 8,0              | 6,2            | 7,8        | 8,0        | 7,8        | 0,0      | 1,1      | 0,0       | 0,0      |     |
|                         | ETBE-enrichment clones affiliated to Hydrogenophaga; Hydrogenophaga taeniospiralis                                 | <b>HydETBE1</b>                         | 8,1              | 5,3            | 9,3        | 8,8        | 8,4        | 0,8      | 2,6      | 1,3       | 0,8      |     |
|                         | ETBE-enrichment clones affiliated to Hydrogenophaga; Hydrogenophaga taeniospiralis                                 | <b>HydETBE3</b>                         | 4,9              | 3,0            | 4,9        | 5,0        | 5,1        | 0,0      | 0,5      | 0,0       | 0,0      |     |
|                         | Most Nitrosospira                                                                                                  | <b>Nit1B</b>                            | 6,3              | 5,1            | 6,5        | 6,5        | 6,2        | 2,4      | 3,2      | 3,9       | 3,6      |     |
|                         | Azoarcus                                                                                                           | <b>Arcus1</b>                           | 0,0              | 0,0            | 0,0        | 0,0        | 0,0        | 1,8      | 1,1      | 4,8       | 4,0      |     |
|                         | Azoarcus                                                                                                           | <b>Arcus2</b>                           | 0,0              | 0,0            | 0,0        | 0,0        | 0,0        | 2,5      | 1,5      | 5,4       | 4,3      |     |
|                         | acquirer clones affiliated to Polaromonas; Polaromonas naphthalenivorans; Polaromonas hydrogenivorans              | <b>Polarcln</b>                         | 0,0              | 0,0            | 0,0        | 0,0        | 0,0        | 3,2      | 3,2      | 1,7       | 2,6      |     |
|                         | Herbaspirillum seropedicae, Massilia timonae                                                                       | <b>Hefri2</b>                           | 0,0              | 0,9            | 0,0        | 0,0        | 0,0        | 1,2      | 1,2      | 5,1       | 3,5      |     |
|                         | acquirer clones affiliated to Acidovorax few Azoarcus spp.                                                         | <b>AcidP2cln</b>                        | 2,3              | 0,0            | 0,0        | 0,0        | 0,0        | 2,1      | 2,5      | 3,7       | 3,4      |     |
| Gammaproteobacteria     | acquirer clones affiliated to Comamonadaceae                                                                       | <b>AZA463</b>                           | 0,0              | 0,0            | 0,0        | 0,0        | 0,0        | 1,8      | 0,7      | 4,5       | 2,9      |     |
|                         | Aquicola tertiaricarbonis                                                                                          | <b>Rhodofcln</b>                        | 0,0              | 0,0            | 0,0        | 0,0        | 0,0        | 1,0      | 1,7      | 3,0       | 2,9      |     |
|                         | Xanthomonas                                                                                                        | <b>Aqutert</b>                          | 0,0              | 1,9            | 0,0        | 0,0        | 0,0        | 2,7      | 3,0      | 2,3       | 1,8      |     |
|                         | Xanthomonas                                                                                                        | <b>XAN818</b>                           | 2,5              | 4,7            | 1,9        | 1,5        | 0,5        | 0,0      | 0,0      | 1,1       | 0,0      |     |
|                         | Deltaproteobacteria                                                                                                | Desulfovibrio                           | <b>DVLVT222f</b> | 0,0            | 0,0        | 0,0        | 0,0        | 0,0      | 2,7      | 4,0       | 1,8      | 1,8 |
|                         |                                                                                                                    | Epsilonproteobacteria                   | Campylobacter    | <b>Campy</b>   | 1,0        | 0,4        | 0,0        | 0,0      | 0,0      | 3,1       | 2,7      | 1,8 |
|                         | acquirer clones affiliated to Syntrophaceae; Syntrophus gentianae, Syntrophus buswellii, Syntrophus aciditrophicus |                                         | <b>Syncln1</b>   | 0,0            | 0,0        | 0,0        | 0,0        | 0,0      | 2,6      | 2,7       | 1,5      | 2,0 |
|                         | Actinobacteria                                                                                                     |                                         | Actinomycetales  | <b>ActORD1</b> | 0,0        | 3,5        | 4,0        | 3,2      | 2,8      | 0,0       | 0,0      | 0,0 |
|                         | Cyanobacteria                                                                                                      | Prochlorothrix                          | <b>Prochlo1</b>  | 0,0            | 0,0        | 0,0        | 0,0        | 0,0      | 2,5      | 2,4       | 0,9      | 2,8 |
|                         | Spirochaetes                                                                                                       | acquirer clones affiliated to Treponema | <b>trepncln</b>  | 0,0            | 0,0        | 0,0        | 0,0        | 0,0      | 4,8      | 4,7       | 4,4      | 5,1 |
| unclassified            | acquirer clones affiliated to unclassified Bacteria (with closest relatives affiliated to Acetanaerobacterium)     | <b>acetancln</b>                        | 0,0              | 0,0            | 0,0        | 0,0        | 0,0        | 3,7      | 4,1      | 2,2       | 3,4      |     |
|                         | Most Planctomycetes                                                                                                | <b>Plancto4-mB</b>                      | 0,0              | 0,6            | 0,0        | 0,0        | 0,0        | 2,6      | 2,7      | 2,0       | 2,5      |     |

C

| Taxonomical affiliation                                                                             | Probe target                                                                                                           | Probe                                                                                                                         | UW_ETBE_I1 | UW_ETBE_I2 | UW_ETBE_I3 | UW_ETBE_S1 | UW_ETBE_S2 | UW_III/09 | UW_XI/08 | UW_IV/09 | UW_VI/08 |     |
|-----------------------------------------------------------------------------------------------------|------------------------------------------------------------------------------------------------------------------------|-------------------------------------------------------------------------------------------------------------------------------|------------|------------|------------|------------|------------|-----------|----------|----------|----------|-----|
| Alphaproteobacteria                                                                                 | Rhizobiaceae (excepted Agrobacterium), Bradyrhizobiaceae, Brucellaceae and Brevundimonas                               | Rhizo157                                                                                                                      | 4,9        | 6,0        | 5,3        | 4,8        | 3,6        | 2,6       | 0,9      | 1,6      | 1,2      |     |
|                                                                                                     | Rhizobiaceae, Brucellaceae, Bartonella, Phyllobacteriaceae, Blastochloris, Azospirillum irakense and amazonense        | Rzbc1247                                                                                                                      | 4,4        | 4,7        | 4,7        | 5,0        | 4,9        | 3,1       | 2,2      | 2,9      | 3,3      |     |
|                                                                                                     | Rhizobiaceae (excepted Agrobacterium)                                                                                  | Rhi                                                                                                                           | 2,9        | 3,0        | 3,3        | 3,0        | 1,9        | 1,1       | 0,5      | 0,7      | 0,4      |     |
|                                                                                                     | Some Rhizobium, Mesorhizobium, Phyllobacterium, Methylobacterium, Acetobacter, Gluconacetobacter, Rhodospirillaceae    | Rgal157                                                                                                                       | 4,0        | 4,1        | 2,3        | 4,3        | 4,0        | 1,0       | 0,8      | 0,9      | 0,8      |     |
|                                                                                                     | Mesorhizobium/Rhizobium                                                                                                | Phyllobact                                                                                                                    | 4,8        | 3,1        | 1,3        | 4,9        | 4,3        | 0,0       | 0,0      | 0,0      | 0,0      |     |
|                                                                                                     | ETBE-enrichment clones affiliated to Mesorhizobium                                                                     | Mesocln1                                                                                                                      | 5,4        | 1,5        | 0,0        | 4,4        | 3,9        | 0,0       | 0,0      | 0,0      | 0,0      |     |
|                                                                                                     | ETBE-enrichment clones affiliated to Devosia; several Devosia spp., Pelagibacterium halotolerans, Cucumibacter marinus | Davocln1                                                                                                                      | 3,9        | 2,3        | 3,7        | 4,9        | 4,9        | 1,2       | 0,0      | 0,0      | 1,0      |     |
|                                                                                                     | Bradyrhizobiaceae                                                                                                      | Brady4                                                                                                                        | 3,1        | 5,2        | 4,6        | 5,5        | 5,3        | 2,1       | 1,6      | 3,1      | 1,5      |     |
|                                                                                                     | Most Bradyrhizobium and Afipia                                                                                         | Brady6A                                                                                                                       | 1,7        | 1,9        | 1,8        | 2,5        | 2,2        | 0,0       | 0,0      | 1,1      | 0,0      |     |
|                                                                                                     | Rhodospirillum                                                                                                         | Rhodo2                                                                                                                        | 1,2        | 2,1        | 2,0        | 2,2        | 1,4        | 0,5       | 0,0      | 0,9      | 0,0      |     |
|                                                                                                     | Rhodopseudomonas                                                                                                       | Rhodopseud                                                                                                                    | 1,8        | 3,1        | 3,0        | 1,3        | 0,7        | 0,4       | 0,6      | 0,0      | 0,5      |     |
|                                                                                                     | Betaproteobacteria                                                                                                     | Betaproteobacteria                                                                                                            | Beta2      | 0,0        | 0,6        | 0,0        | 1,2        | 0,0       | 4,6      | 2,3      | 3,3      | 3,3 |
|                                                                                                     |                                                                                                                        | Betaproteobacteria                                                                                                            | Beta3      | 0,0        | 0,0        | 0,0        | 0,7        | 0,0       | 3,0      | 2,2      | 2,5      | 2,3 |
|                                                                                                     |                                                                                                                        | Janthinobacterium agaricidamnosum, Massilia timonae, Massilia aerilata, Massilia plicata                                      | Janaga2    | 0,0        | 0,0        | 0,0        | 0,0        | 0,0       | 3,1      | 0,2      | 2,9      | 0,6 |
|                                                                                                     |                                                                                                                        | Janthinobacterium agaricidamnosum, Massilia timonae, Massilia aerilata, Massilia plicata                                      | Janaga3    | 0,0        | 0,9        | 0,0        | 0,0        | 0,0       | 4,2      | 0,7      | 4,4      | 1,1 |
| Herbaspirillum seropedicae, Massilia timonae                                                        |                                                                                                                        | Hefri2                                                                                                                        | 1,8        | 0,0        | 0,0        | 0,6        | 0,0        | 4,4       | 3,5      | 4,5      | 1,7      |     |
| Most Nitrospira                                                                                     |                                                                                                                        | Nit1B                                                                                                                         | 0,0        | 1,6        | 0,0        | 0,0        | 1,4        | 3,4       | 3,3      | 2,3      | 1,5      |     |
| ETBE-enrichment clones affiliated to Aquabacterium                                                  |                                                                                                                        | Aquacln2                                                                                                                      | 0,0        | 0,0        | 0,0        | 0,0        | 0,0        | 2,7       | 1,1      | 1,6      | 1,9      |     |
| acquirer clones affiliated to Oxalobacteraceae                                                      |                                                                                                                        | Dugacln                                                                                                                       | 0,0        | 0,0        | 0,0        | 0,0        | 0,0        | 3,4       | 1,6      | 3,4      | 0,6      |     |
| Aquicola tertiarycarbonis                                                                           |                                                                                                                        | Aqutert                                                                                                                       | 0,5        | 0,0        | 0,8        | 0,4        | 0,0        | 3,0       | 1,1      | 1,5      | 2,8      |     |
| Actinobacteria                                                                                      |                                                                                                                        | Actinomycetales                                                                                                               | ActORD1    | 3,0        | 3,6        | 3,2        | 2,3        | 3,5       | 1,3      | 0,3      | 0,4      | 0,5 |
|                                                                                                     |                                                                                                                        | Most Actinobacteria                                                                                                           | HGC236-m   | 2,9        | 3,0        | 2,7        | 1,4        | 2,9       | 1,1      | 0,5      | 0,6      | 0,8 |
|                                                                                                     |                                                                                                                        | Pseudonocardia spp. (P. hydrocarbonoxydans, P. sulfidoxydans, P. benzenivorans, P. oroxyli, P. ailaonensis, P. petroleophila) | Psdonoca   | 2,8        | 2,9        | 2,5        | 3,1        | 4,7       | 0,6      | 0,0      | 0,0      | 0,0 |
|                                                                                                     |                                                                                                                        | ETBE-enrichment clones affiliated to Pseudonocardia                                                                           | Psenocln2  | 1,2        | 0,7        | 1,8        | 2,7        | 3,7       | 0,0      | 0,0      | 0,0      | 0,0 |
|                                                                                                     |                                                                                                                        | ETBE-enrichment clones affiliated to Gordonia; Gordonia terrae                                                                | Gordcln3   | 2,8        | 3,4        | 0,5        | 2,0        | 3,0       | 0,0      | 0,0      | 0,0      | 0,0 |
|                                                                                                     |                                                                                                                        | Mycobacterium                                                                                                                 | Mycoba1    | 2,0        | 2,2        | 1,6        | 0,0        | 1,9       | 0,0      | 0,0      | 0,0      | 0,0 |
|                                                                                                     | Mycobacterium                                                                                                          | Mycoba2                                                                                                                       | 2,2        | 2,6        | 1,8        | 0,9        | 2,2        | 0,0       | 0,0      | 0,0      | 0,0      |     |
|                                                                                                     | ETBE-enrichment clones affiliated to Leifsonia; Leifsonia kribbensis, Lysinimonas soli                                 | Leifcln2                                                                                                                      | 1,9        | 0,0        | 1,0        | 2,1        | 3,8        | 0,0       | 0,0      | 0,0      | 0,0      |     |
|                                                                                                     | Gammaproteobacteria                                                                                                    | Xanthomonas                                                                                                                   | XAN818     | 2,4        | 1,9        | 4,6        | 3,2        | 2,9       | 0,6      | 0,0      | 0,0      | 1,8 |
|                                                                                                     |                                                                                                                        | Pseudomonas                                                                                                                   | Pseud      | 0,0        | 0,9        | 0,0        | 0,0        | 0,0       | 3,4      | 1,2      | 1,6      | 1,1 |
| acquirer clones affiliated to Cupriavidus; several Cupriavidus spp., Ralstonia spp., Wautersia spp. |                                                                                                                        | Ralstcln2                                                                                                                     | 0,0        | 0,0        | 0,0        | 0,0        | 0,0        | 2,8       | 2,2      | 1,9      | 1,2      |     |
| Achromatium                                                                                         |                                                                                                                        | Achro1                                                                                                                        | 0,0        | 0,0        | 0,0        | 0,0        | 0,0        | 1,1       | 2,3      | 1,5      | 2,1      |     |
| Firmicutes                                                                                          | Bacillus agaradherens                                                                                                  | Adh                                                                                                                           | 1,7        | 0,0        | 2,1        | 3,2        | 1,6        | 0,0       | 0,0      | 0,0      | 0,0      |     |
|                                                                                                     | Nitrospira                                                                                                             | Nitrospira                                                                                                                    | NSR1156    | 0,0        | 0,0        | 0,0        | 0,0        | 0,0       | 1,1      | 0,9      | 1,5      | 2,5 |
| Nitrospira clones from UW                                                                           |                                                                                                                        | NitrospcIn                                                                                                                    | 0,0        | 0,0        | 0,0        | 0,0        | 0,0        | 1,2       | 0,0      | 1,9      | 2,8      |     |
| Chloroflexi                                                                                         | ETBE-enrichment clones affiliated to Anaerolineaceae                                                                   | Dehacln4                                                                                                                      | 2,7        | 1,6        | 3,0        | 3,8        | 3,7        | 0,0       | 0,4      | 0,0      | 0,0      |     |
|                                                                                                     | ETBE-enrichment clones affiliated to Anaerolineaceae                                                                   | Dehacln5                                                                                                                      | 2,9        | 1,7        | 3,6        | 3,6        | 4,4        | 0,0       | 0,0      | 0,0      | 0,0      |     |
|                                                                                                     | ETBE-enrichment clones affiliated to Anaerolineaceae                                                                   | Dehacln6                                                                                                                      | 4,8        | 4,2        | 4,6        | 5,8        | 5,9        | 1,7       | 2,5      | 1,6      | 2,0      |     |
|                                                                                                     | ETBE-enrichment clones affiliated to Anaerolineaceae                                                                   | Dehacln9                                                                                                                      | 0,6        | 0,0        | 0,5        | 0,5        | 0,0        | 1,1       | 3,5      | 1,2      | 1,9      |     |
| Planctomycetes                                                                                      | Most Planctomycetes                                                                                                    | Plancto4-mA                                                                                                                   | 0,0        | 1,4        | 0,8        | 0,0        | 0,0        | 1,3       | 1,8      | 2,9      | 2,9      |     |
|                                                                                                     | Most Planctomycetes                                                                                                    | Plancto4-mB                                                                                                                   | 0,5        | 1,7        | 1,1        | 0,3        | 0,4        | 2,0       | 2,4      | 3,0      | 2,9      |     |
| PVC superphylum                                                                                     | certain Planctomycetes, Lentipshaerae, Verrucomicrobiaceae and OP3 candidate phylum                                    | PLA46                                                                                                                         | 0,0        | 0,0        | 0,0        | 0,0        | 0,0        | 0,8       | 1,0      | 2,4      | 2,5      |     |
| unclassified                                                                                        | acquirer clones affiliated to unclassified Bacteria                                                                    | OP3cIn1                                                                                                                       | 0,0        | 0,0        | 0,0        | 0,0        | 0,0        | 1,3       | 1,3      | 2,5      | 2,9      |     |
|                                                                                                     | acquirer clones affiliated to unclassified Bacteria                                                                    | OP3cIn2                                                                                                                       | 0,5        | 0,4        | 0,3        | 0,3        | 0,6        | 2,4       | 2,3      | 2,9      | 3,0      |     |
|                                                                                                     | acquirer clones affiliated to unclassified Bacteria (with closest relatives affiliated to Acetanaerobacterium)         | acetancIn                                                                                                                     | 1,5        | 1,2        | 0,9        | 1,4        | 1,8        | 3,2       | 3,4      | 4,2      | 4,2      |     |

# D

| Taxonomical affiliation | Probe target                                                                                                                  | Probe             | PW_ETBE_I1 | PW_ETBE_I2 | PW_ETBE_S1 | PW_ETBE_S2 | PW_ETBE_S3 | UW_ETBE_I1 | UW_ETBE_I2 | UW_ETBE_I3 | UW_ETBE_S1 | UW_ETBE_S2 |
|-------------------------|-------------------------------------------------------------------------------------------------------------------------------|-------------------|------------|------------|------------|------------|------------|------------|------------|------------|------------|------------|
| Alphaproteobacteria     | Rhizobiaceae (excepted Agrobacterium), Bradyrhizobiaceae, Brucellaceae and Brevundimonas                                      | <b>Rhizo157</b>   | 4,5        | 4,3        | 2,0        | 1,7        | 2,0        | 4,9        | 6,0        | 5,3        | 4,8        | 3,6        |
|                         | Rhizobiaceae (excepted Agrobacterium)                                                                                         | <b>Rhi</b>        | 1,7        | 2,3        | 0,4        | 0,0        | 0,0        | 2,9        | 3,0        | 3,3        | 3,0        | 1,9        |
|                         | Mesorhizobium/Rhizobium                                                                                                       | <b>Phyllobact</b> | 0,0        | 2,6        | 0,0        | 0,0        | 0,0        | 4,8        | 3,1        | 1,3        | 4,9        | 4,3        |
|                         | ETBE-enrichment clones affiliated to Mesorhizobium                                                                            | <b>Mesocln1</b>   | 0,0        | 1,3        | 0,0        | 0,0        | 0,0        | 5,4        | 1,5        | 0,0        | 4,4        | 3,9        |
|                         | Agrobacterium genomospecies G1, G3, G4, and G7, A. rubi, A. larrymoorei, some Rhizobium and some Brevundimonas                | <b>B6-603</b>     | 0,5        | 1,1        | 0,0        | 0,0        | 0,0        | 2,8        | 3,1        | 2,8        | 2,5        | 1,4        |
|                         | ETBE-enrichment clones affiliated to Devosia; several Devosia spp., Pelagibacterium halotolerans, Cucumibacter marinus        | <b>Davocln1</b>   | 0,0        | 2,8        | 2,7        | 2,3        | 1,7        | 3,9        | 2,3        | 3,7        | 4,9        | 4,9        |
| Betaproteobacteria      | Betaproteobacteria                                                                                                            | <b>Beta2</b>      | 6,6        | 1,9        | 5,7        | 5,5        | 5,6        | 0,0        | 0,6        | 0,0        | 1,2        | 0,0        |
|                         | Betaproteobacteria                                                                                                            | <b>Beta3</b>      | 4,4        | 1,2        | 4,2        | 4,4        | 4,5        | 0,0        | 0,0        | 0,0        | 0,7        | 0,0        |
|                         | Betaproteobacteria (excepted Comamonadaceae, Nitrosomonadaceae and Methylophilaceae)                                          | <b>BET940</b>     | 6,2        | 4,4        | 6,3        | 6,4        | 6,1        | 2,2        | 2,8        | 1,5        | 3,7        | 1,6        |
|                         | Hydrogenophaga flava, pseudoflava and taeniospiralis                                                                          | <b>HyMa2</b>      | 8,0        | 6,2        | 7,8        | 8,0        | 7,8        | 0,0        | 3,5        | 0,3        | 0,0        | 2,1        |
|                         | ETBE-enrichment clones affiliated to Hydrogenophaga; Hydrogenophaga taeniospiralis                                            | <b>HydETBE1</b>   | 8,1        | 5,3        | 9,3        | 8,8        | 8,4        | 0,0        | 2,7        | 0,0        | 0,0        | 1,7        |
|                         | ETBE-enrichment clones affiliated to Hydrogenophaga; Hydrogenophaga taeniospiralis                                            | <b>HydETBE3</b>   | 4,9        | 3,0        | 4,9        | 5,0        | 5,1        | 0,0        | 0,7        | 0,0        | 0,0        | 0,5        |
|                         | Most Nitrosospira                                                                                                             | <b>Nit1B</b>      | 6,3        | 5,1        | 6,5        | 6,5        | 6,2        | 0,0        | 1,6        | 0,0        | 0,0        | 1,4        |
|                         | Some Nitrosospira                                                                                                             | <b>Nit1C</b>      | 8,3        | 3,8        | 9,8        | 8,9        | 8,8        | 0,0        | 2,1        | 0,0        | 0,0        | 1,1        |
|                         | ETBE-enrichment clones affiliated to Aquabacterium                                                                            | <b>Aquacln2</b>   | 4,8        | 0,6        | 3,7        | 3,6        | 3,7        | 0,0        | 0,0        | 0,0        | 0,0        | 0,0        |
|                         | Variovorax paradoxus                                                                                                          | <b>Varpar</b>     | 4,1        | 0,6        | 4,0        | 3,9        | 3,9        | 0,0        | 0,0        | 0,0        | 0,4        | 0,0        |
| Gammaproteobacteria     | Nitrosococcus mobilis                                                                                                         | <b>Nitmob</b>     | 2,5        | 0,6        | 2,6        | 2,7        | 2,5        | 0,0        | 0,0        | 0,0        | 0,0        | 0,0        |
|                         | acquirer clones affiliated to Cupriavidus; several Cupriavidus spp., Ralstonia spp., Wautersia spp.                           | <b>Ralstcln2</b>  | 0,0        | 0,0        | 1,7        | 3,9        | 4,4        | 0,0        | 0,0        | 0,0        | 0,0        | 0,0        |
|                         | Eikenella corrodens, Neisseria flavescens                                                                                     | <b>Eikcor2</b>    | 4,7        | 0,5        | 4,6        | 4,2        | 4,5        | 0,6        | 0,0        | 0,0        | 0,0        | 0,0        |
| Firmicutes              | Paenibacillus alvei                                                                                                           | <b>Palv</b>       | 2,9        | 0,3        | 2,9        | 2,9        | 3,0        | 0,0        | 0,0        | 0,0        | 0,0        | 0,0        |
|                         | Paenibacillus apiarius                                                                                                        | <b>Palv2</b>      | 3,4        | 0,0        | 2,8        | 2,9        | 2,9        | 0,0        | 0,0        | 0,0        | 0,0        | 0,0        |
| Actinobacteria          | ETBE-enrichment clones affiliated to Gordonia; Gordonia terrae                                                                | <b>Gordcln3</b>   | 0,0        | 0,0        | 0,0        | 0,0        | 0,0        | 2,8        | 3,4        | 0,5        | 2,0        | 3,0        |
|                         | Mycobacterium                                                                                                                 | <b>Mycoba2</b>    | 0,0        | 0,0        | 0,0        | 0,0        | 0,0        | 2,2        | 2,6        | 1,8        | 0,9        | 2,2        |
|                         | Pseudonocardia spp. (P. hydrocarbonoxydans, P. sulfidoxydans, P. benzenivorans, P. oroxyli, P. ailaonensis, P. petroleophila) | <b>Psdonoca</b>   | 0,0        | 0,0        | 0,0        | 0,0        | 0,0        | 2,8        | 2,9        | 2,5        | 3,1        | 4,7        |
| Nitrospira              | ETBE-enrichment clones affiliated to Pseudonocardia                                                                           | <b>Psenocln2</b>  | 0,0        | 0,0        | 0,0        | 0,0        | 0,0        | 1,2        | 0,7        | 1,8        | 2,7        | 3,7        |
|                         | Nitrospira                                                                                                                    | <b>NSR826</b>     | 0,0        | 0,0        | 0,0        | 0,0        | 0,0        | 2,7        | 2,9        | 3,3        | 0,0        | 0,7        |
| Chloroflexi             | ETBE-enrichment clones affiliated to Anaerolineaceae                                                                          | <b>Dehacln4</b>   | 0,0        | 0,0        | 0,0        | 0,7        | 0,0        | 2,7        | 1,6        | 3,0        | 3,8        | 3,7        |
|                         | ETBE-enrichment clones affiliated to Anaerolineaceae                                                                          | <b>Dehacln5</b>   | 0,0        | 0,0        | 0,9        | 0,9        | 0,8        | 2,9        | 1,7        | 3,6        | 3,6        | 4,4        |
|                         | ETBE-enrichment clones affiliated to Anaerolineaceae                                                                          | <b>Dehacln6</b>   | 2,2        | 1,1        | 2,8        | 2,7        | 2,5        | 4,8        | 4,2        | 4,6        | 5,8        | 5,9        |
