# Supplementary material
Source: MDPI journal article supplement (https://www.mdpi.com/2076-3417/9/20/4247)

**Figure S5.** Degradation of ETBE and TBA (produced in the course of ETBE biodegradation) in UW ETBE-enrichment subcultures S1-S3 (**A**) and PW ETBE-enrichment subcultures S1-S3 (**B**). Mean residual ETBE (black squares) and TBA (open triangles) concentrations are shown. Error bars indicate standard deviations. Three successive additions of ETBE (100 mg L<sup>-1</sup>) were carried out as indicated by black arrows above the graph. Samplings for molecular analyses are indicated with gray stars at the x-axes.

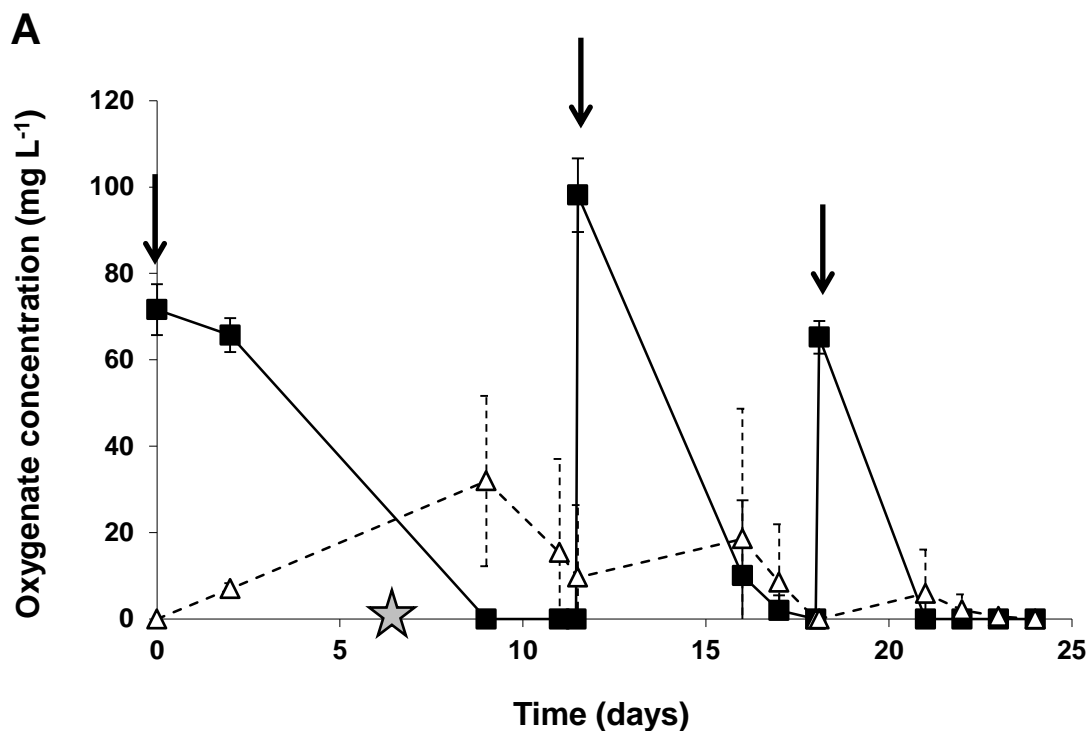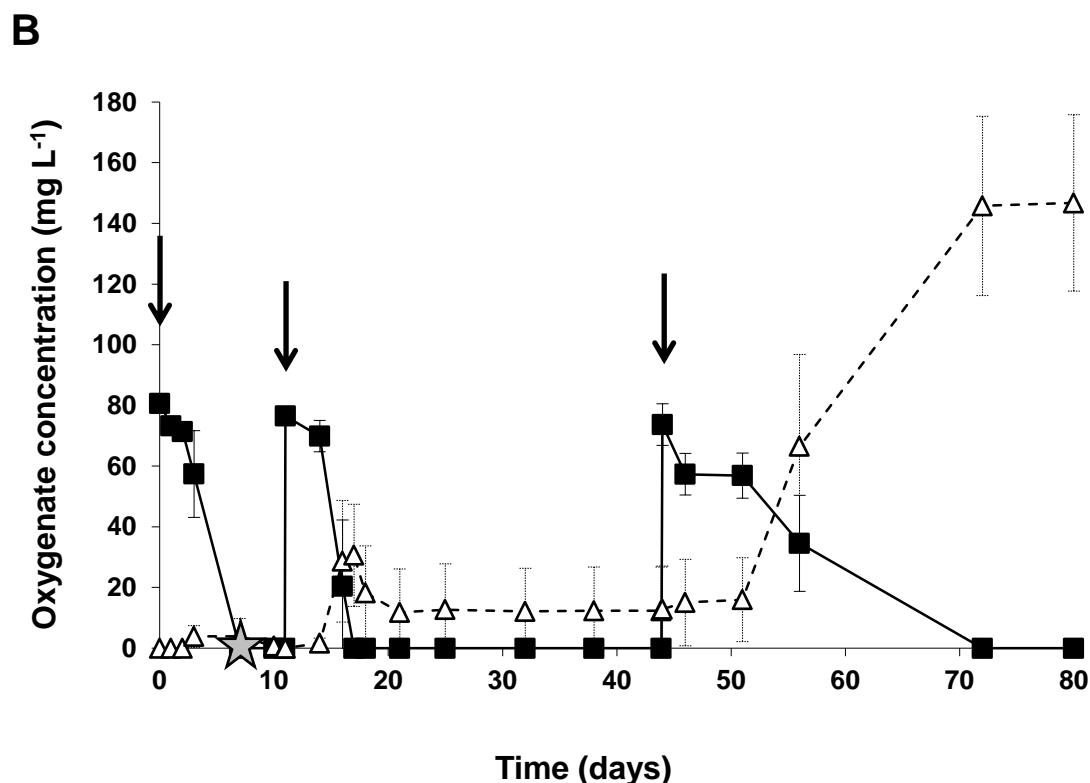

Supplement: s1 [file s1]
