# Supplementary material
Source: MDPI journal article supplement (https://www.mdpi.com/2076-3417/9/20/4247)

**Figure S1.** A simplified overview of the ETBE-enrichment cultures from PW and UW water and their biodegradation properties. Cultures marked with \* were analyzed with microarray. Cultures marked with \*\* were analyzed with microarray and sequencing.

### Enrichment cultures based on PW water

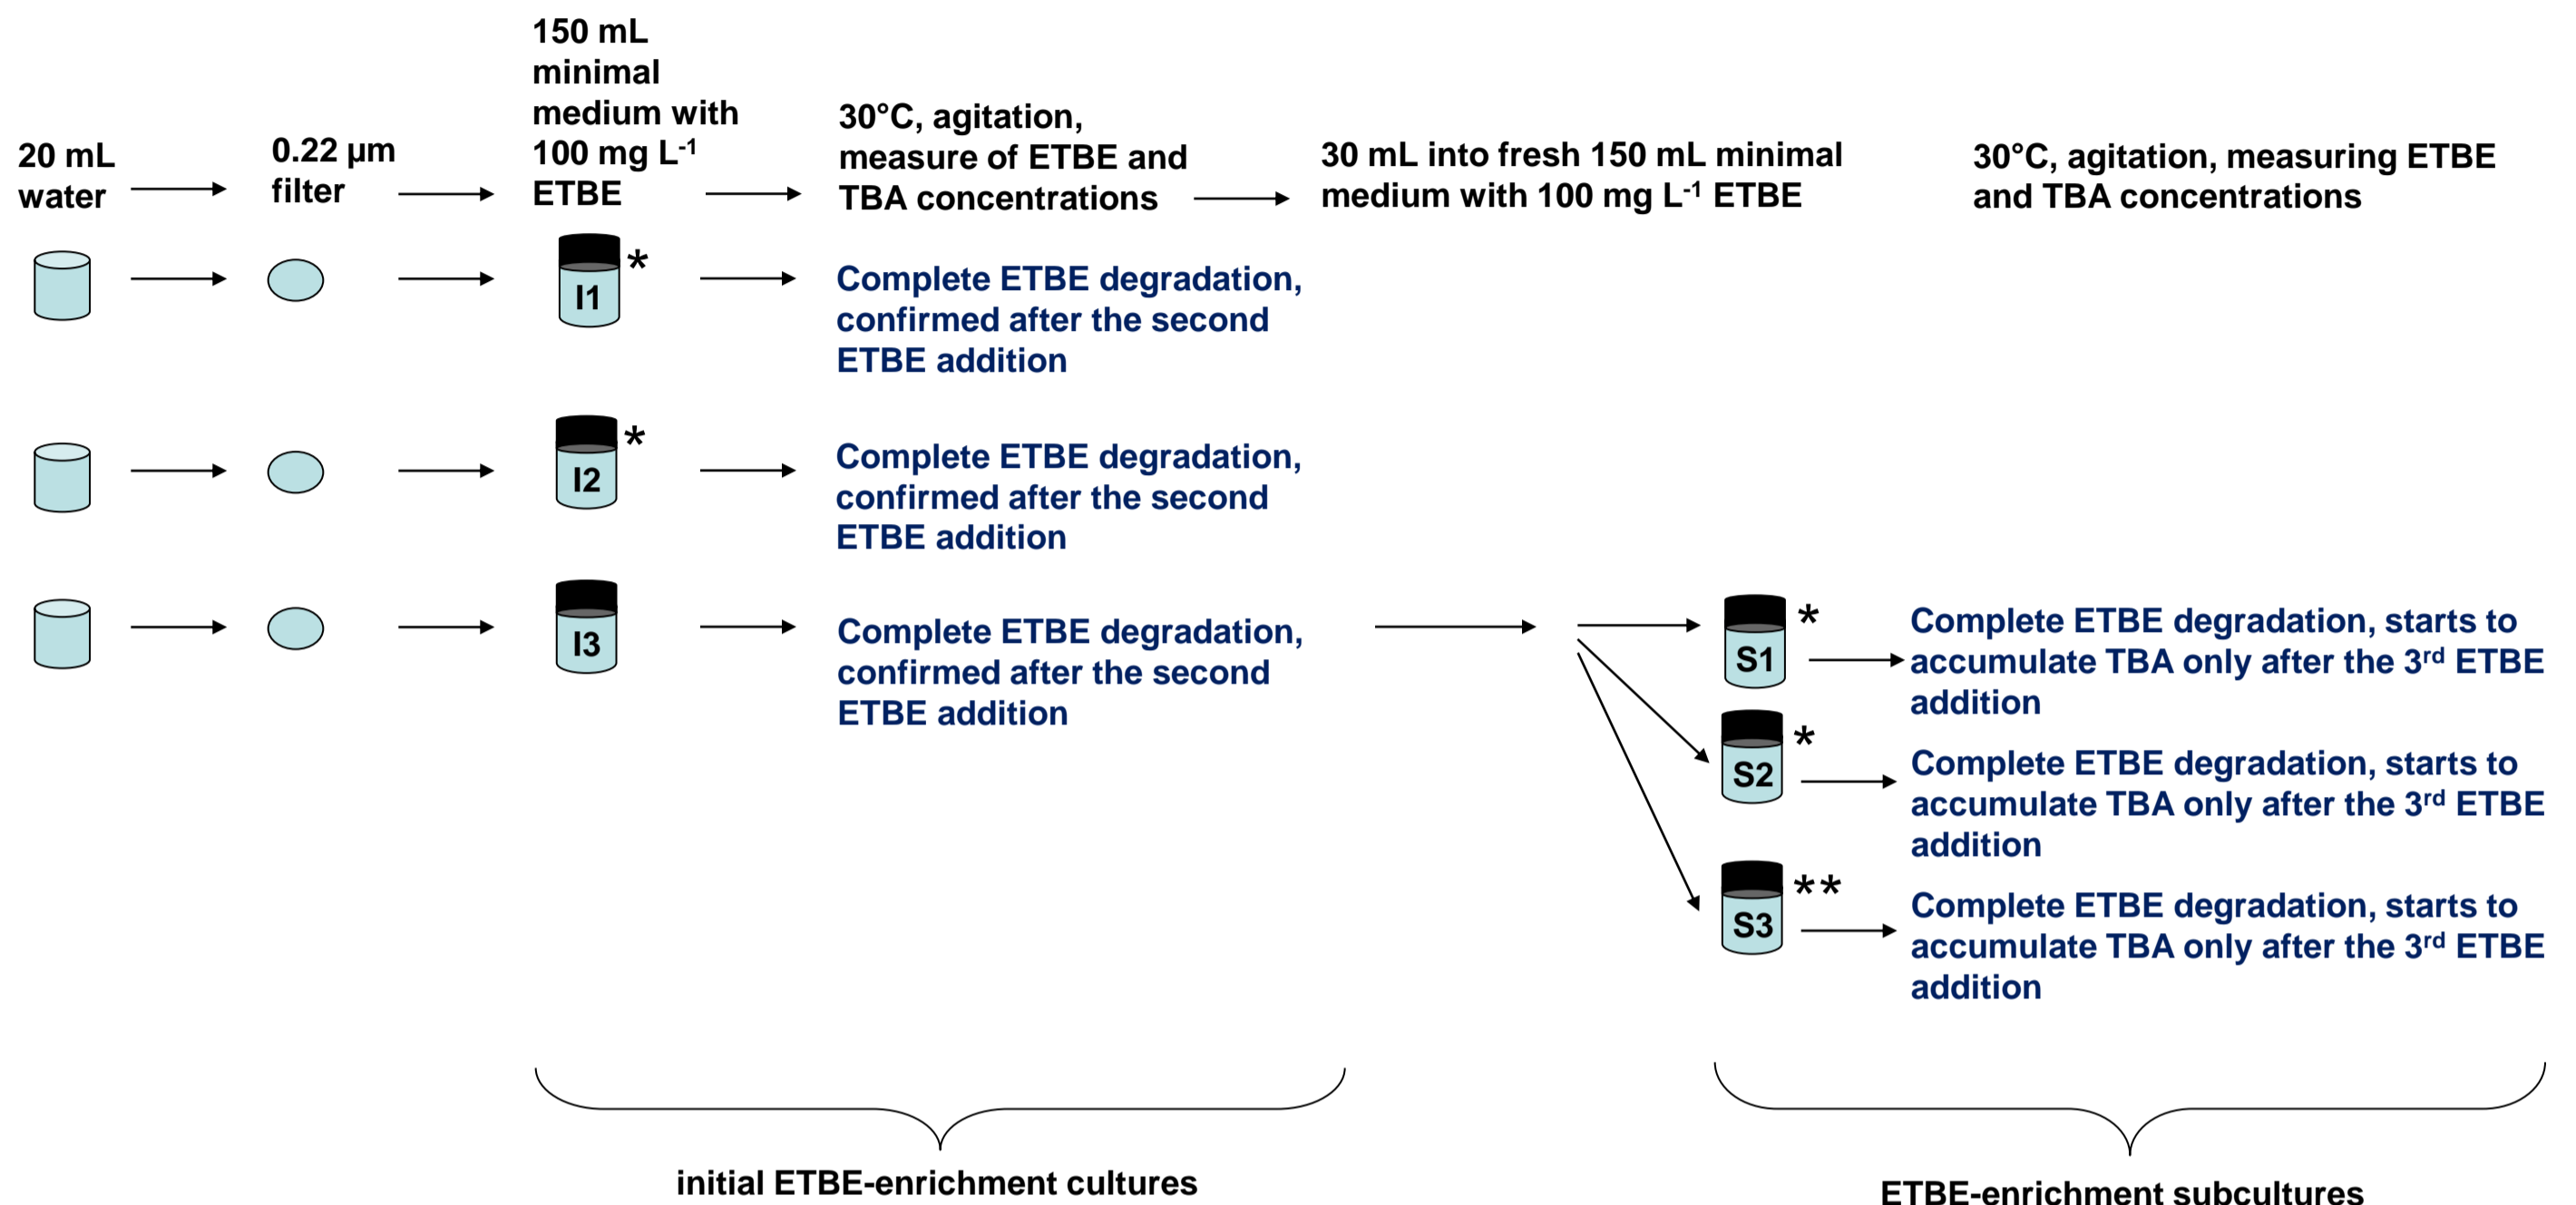

### Enrichment cultures based on UW water

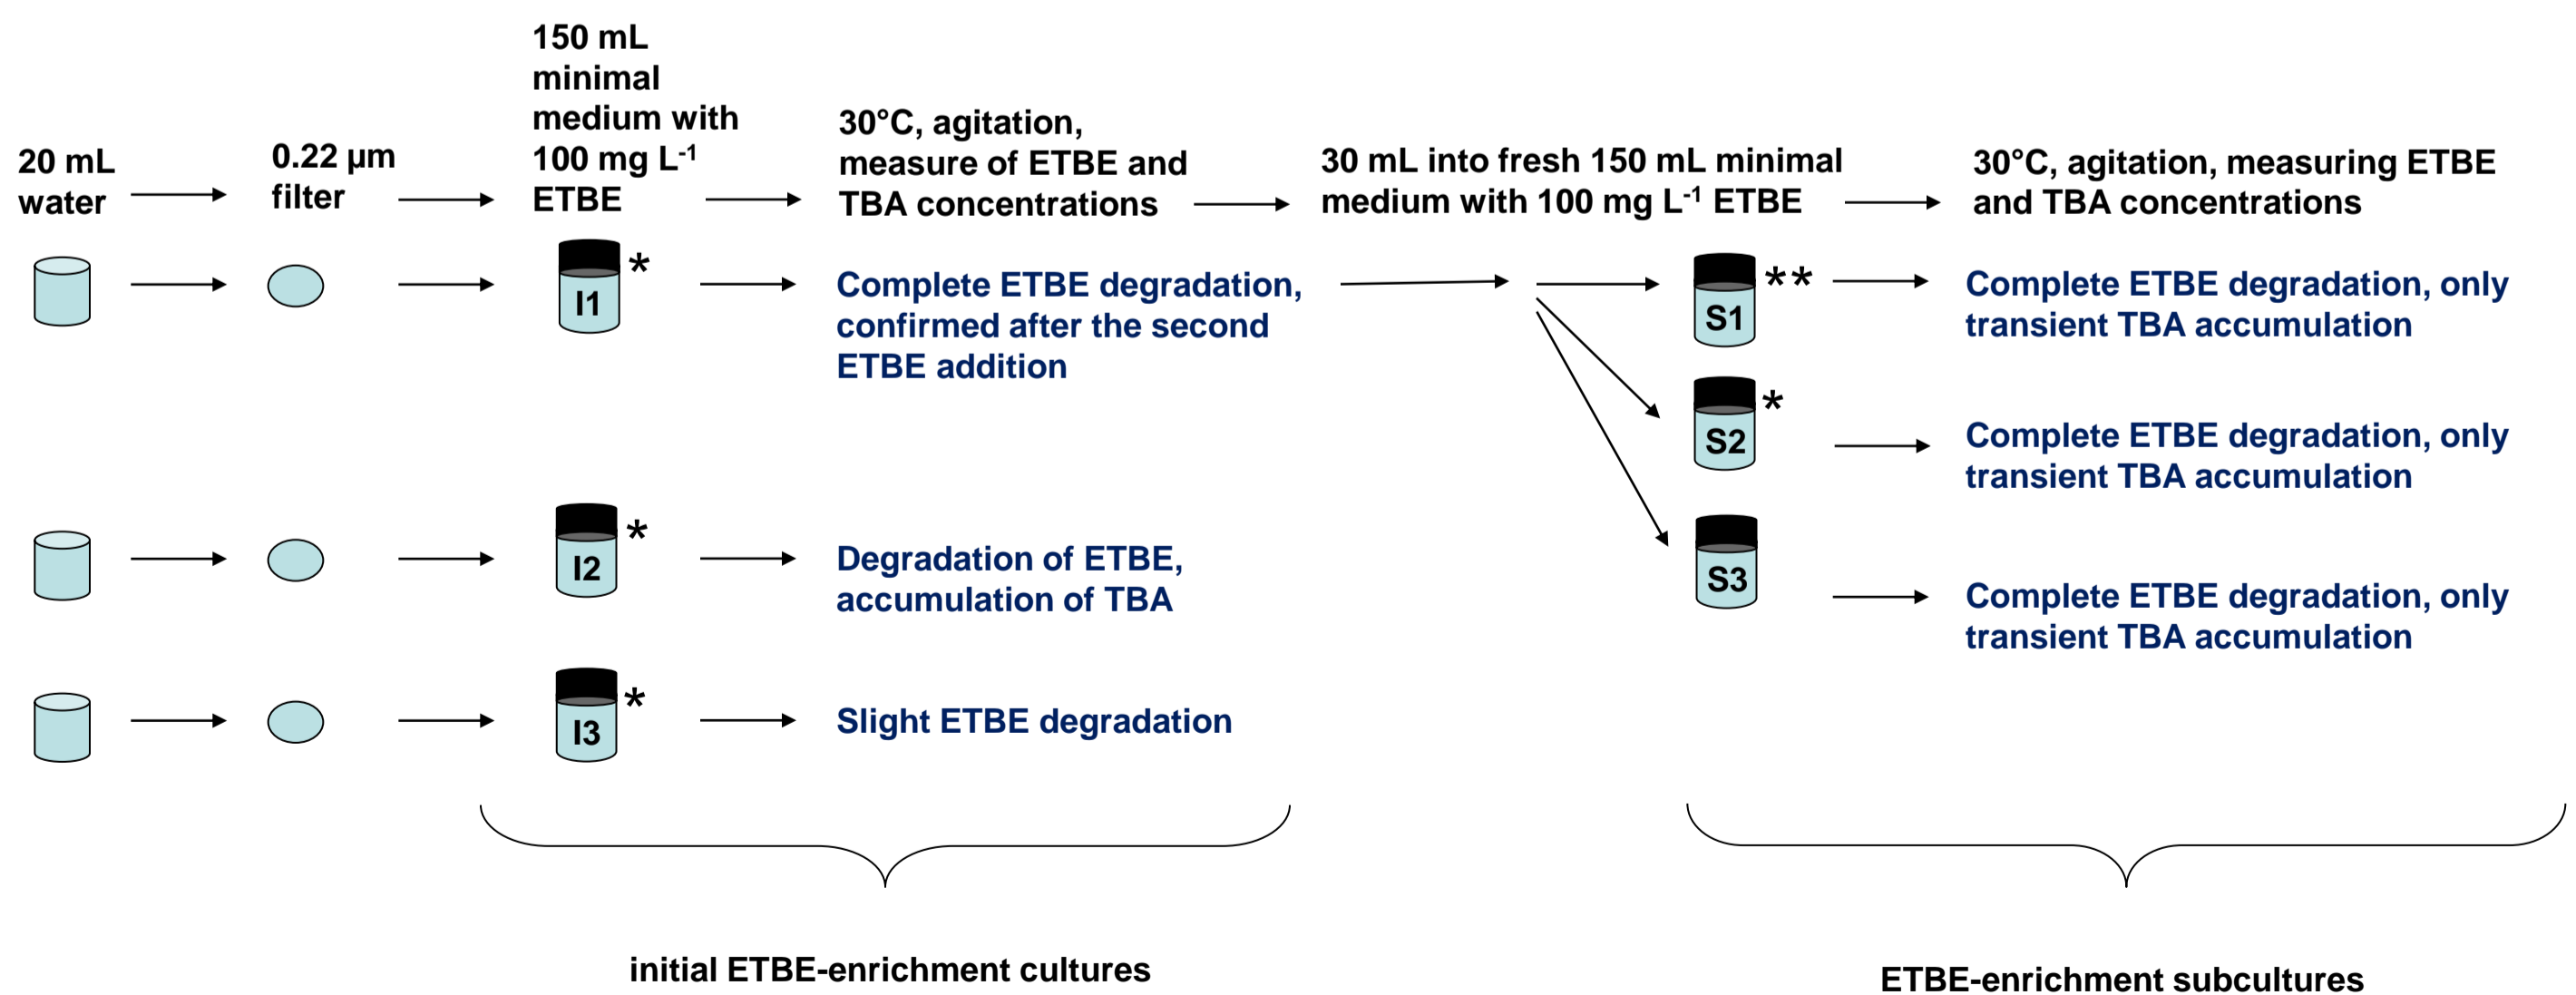

Supplement: s1 [file s1]
