# Supplementary material
Source: MDPI journal article supplement (https://www.mdpi.com/2076-3417/9/20/4247)
Supplement: s1 [file s1]

**Table S1.** List of new probes designed in this study and their targets.

| Probe name        | Probe sequence (5'-3') | Probe target                                                                                                           | Taxonomical affiliation of the target |                       |
|-------------------|------------------------|------------------------------------------------------------------------------------------------------------------------|---------------------------------------|-----------------------|
|                   |                        |                                                                                                                        | Family                                | Class/Order           |
| <b>acetancIn</b>  | GTAACGCCTGCCACCTCCGT   | aquifer clones affiliated to unclassified Bacteria (with closest relatives affiliated to Acetanaerobacterium)          |                                       |                       |
| <b>acetovcIn</b>  | GCCACAGTTGAGCCATGGAA   | aquifer clones affiliated to Ruminococcaceae                                                                           | Ruminococcaceae                       | Firmicutes            |
| <b>AcidP2cIn</b>  | GAACCCCTTTATTAGAAGG    | aquifer clones affiliated to Acidovorax                                                                                | Comamonadaceae                        | Betaproteobacteria    |
| <b>AficIn1</b>    | TTGAGATTTGCTAGGGGTCG   | ETBE-enrichment clones affiliated to Afipia; Afipia clevelandensis, Nitrobacter winogradskyi                           | Bradyrhizobiaceae                     | Alphaproteobacteria   |
| <b>anaermycIn</b> | CATGCAGCACCTGAACCACC   | aquifer clones affiliated to unclassified Deltaproteobacteria                                                          |                                       | Deltaproteobacteria   |
| <b>AquaIn2</b>    | CCAACACTACAGATCGTTGCCT | ETBE-enrichment clones affiliated to Aquabacterium                                                                     | Burkholderiales_incertae_sedis        | Betaproteobacteria    |
| <b>Aqutert</b>    | CAGAGCTTTTTCTTCCCGAC   | Aquicola tertiarycarbonis                                                                                              | Burkholderiales_incertae_sedis        | Betaproteobacteria    |
| <b>ArcobcIn</b>   | GATACCATACAGACCCATCC   | aquifer clones affiliated to Arcobacter                                                                                | Campylobacteraceae                    | Epsilonproteobacteria |
| <b>AzovcIn</b>    | CTCAAGGGTCCTGGACATGT   | aquifer clones affiliated to Rhodocyclaceae                                                                            | Rhodocyclaceae                        | Betaproteobacteria    |
| <b>bacIn</b>      | AACCGTCTTTTCAGCACATCT  | aquifer clones affiliated to Bacillus                                                                                  | Bacillaceae 1                         | Firmicutes            |
| <b>bacisp</b>     | GCGTAAACCGTCTTTCAGCA   | aquifer clones affiliated to Bacillus                                                                                  | Bacillaceae 1                         | Firmicutes            |
| <b>bryscIn2</b>   | CTCCTCACACGCTTTACCTT   | aquifer clones affiliated to unclassified Bacteria (with closest relatives affiliated to Phaselicystis)                |                                       |                       |
| <b>ClostIn1</b>   | GGTTTCAGCCACAATCCGA    | aquifer clones affiliated to Ruminococcaceae                                                                           | Ruminococcaceae                       | Firmicutes            |
| <b>cryptancIn</b> | TCTGACCGAAGCCAGAAAAC   | aquifer clones affiliated to Peptococcaceae 2; Cryptanaerobacter phenolicus                                            | Peptococcaceae                        | Firmicutes            |
| <b>DavocIn1</b>   | CAACGGCTAGCTCTCATAGT   | ETBE-enrichment clones affiliated to Devosia; several Devosia spp., Pelagibacterium halotolerans, Cucumibacter marinus | Hyphomicrobiaceae                     | Alphaproteobacteria   |
| <b>DehaIn3</b>    | CCTTGACCGTAGCCAAGTGG   | ETBE-enrichment clones affiliated to Anaerolineaceae                                                                   | Anaerolineaceae                       | Chloroflexi           |
| <b>DehaIn4</b>    | TCTGAATGGACCTCGCCCGG   | ETBE-enrichment clones affiliated to Anaerolineaceae                                                                   | Anaerolineaceae                       | Chloroflexi           |
| <b>DehaIn5</b>    | ACCACCCACTTACCGACCCG   | ETBE-enrichment clones affiliated to Anaerolineaceae                                                                   | Anaerolineaceae                       | Chloroflexi           |
| <b>DehaIn6</b>    | CGCACCCCTCTATCCGCCTC   | ETBE-enrichment clones affiliated to Anaerolineaceae                                                                   | Anaerolineaceae                       | Chloroflexi           |
| <b>DehaIn9</b>    | TGGACTACCGGGGTTTCTAA   | ETBE-enrichment clones affiliated to Anaerolineaceae                                                                   | Anaerolineaceae                       | Chloroflexi           |
| <b>DoktoCIn</b>   | ACTGAACTCTCAATTGAGCC   | aquifer clones affiliated to Xanthomonadaceae                                                                          | Xanthomonadaceae                      | Gammaproteobacteria   |
| <b>DugaCIn</b>    | GAGATATTAGCTCCACCGT    | aquifer clones affiliated to Oxalobacteraceae                                                                          | Oxalobacteraceae                      | Betaproteobacteria    |
| <b>Eryaqua</b>    | CCAGTATTCTAGCAACCTAG   | Erythrobacter aquimaris                                                                                                | Sphingomonadaceae                     | Alphaproteobacteria   |
| <b>Erylong</b>    | CACAGACTGTTTCATCCGTGC  | aquifer clones affiliated to Rhodocyclaceae                                                                            | Rhodocyclaceae                        | Betaproteobacteria    |
| <b>GallicIn</b>   | CCGTCATCCATACAACGTAT   | aquifer clones affiliated to unclassified Betaproteobacteria                                                           |                                       | Betaproteobacteria    |
| <b>GordcIn3</b>   | CAAGCTGGGCCTTCCGTTCCG  | ETBE-enrichment clones affiliated to Gordonia; Gordonia terrae                                                         | Nocardiaceae                          | Actinobacteria        |
| <b>HydETBE1</b>   | TACCGTCATTAGCCCAGGGT   | ETBE-enrichment clones affiliated to Hydrogenophaga; Hydrogenophaga taeniospiralis                                     | Comamonadaceae                        | Betaproteobacteria    |
| <b>HydETBE3</b>   | CCGTCATTAGCCCAGGGTAT   | ETBE-enrichment clones affiliated to Hydrogenophaga; Hydrogenophaga taeniospiralis                                     | Comamonadaceae                        | Betaproteobacteria    |
| <b>hydfla</b>     | TAGCCCCGAGGTATTAACCCA  | TBA-enrichment clones affiliated to Comamonadaceae; Hydrogenophaga flava                                               | Comamonadaceae                        | Betaproteobacteria    |
| <b>isosphcIn1</b> | TGATCCTTTTCGGACCGCATC  | aquifer clones affiliated to Phycisphaera                                                                              | Phycisphaeraceae                      | Planctomycetes        |
| <b>KaistcIn3</b>  | CGAGAAGCTAAGCCTCCCGA   | ETBE-enrichment clones affiliated to unclassified Alphaproteobacteria                                                  |                                       | Alphaproteobacteria   |

|                    |                       |                                                                                                                                                                                            |                               |                     |
|--------------------|-----------------------|--------------------------------------------------------------------------------------------------------------------------------------------------------------------------------------------|-------------------------------|---------------------|
| <b>LeifcIn2</b>    | GAGCTCATCCTGGACCGAAG  | ETBE-enrichment clones affiliated to Leifsonia; Leifsonia kribbensis, Lysinimonas soli                                                                                                     | Microbacteriaceae             | Actinobacteria      |
| <b>magnetcIn</b>   | CCCAGCGAAAGGTATATTCC  | acquirer clones affiliated to Magnetospirillum; Magnetospirillum gryphiswaldense                                                                                                           | Rhodospirillaceae             | Alphaproteobacteria |
| <b>MesocIn1</b>    | GACTCGAGATTGCCAGTATG  | ETBE-enrichment clones affiliated to Mesorhizobium                                                                                                                                         | Phyllobacteriaceae            | Alphaproteobacteria |
| <b>MetcycIn2</b>   | GGCGATCAAACCGGGCATGT  | acquirer clones affiliated to Methylocystis                                                                                                                                                | Methylocystaceae              | Alphaproteobacteria |
| <b>Metpetr3</b>    | AACCAGACCATGCAGCCAGA  | Mycobacterium austroafricanum, Mycobacterium vanbaalenii                                                                                                                                   | Mycobacteriaceae              | Actinobacteria      |
| <b>Mycaus</b>      | CTTTCCCCAACCCAGACCATG | Mycobacterium austroafricanum, Mycobacterium vanbaalenii                                                                                                                                   | Mycobacteriaceae              | Actinobacteria      |
| <b>NitrospcIn</b>  | CACCTACGACCTTCCTGGGT  | acquirer clones affiliated to Nitrospira                                                                                                                                                   | Nitrospiraceae                | Nitrospira          |
| <b>NvsphingcIn</b> | TCTCCAATCCGCGACCAGGA  | acquirer clones affiliated to Novosphingobium                                                                                                                                              | Sphingomonadaceae             | Alphaproteobacteria |
| <b>OP3cIn1</b>     | GGCCGTACTGACTTGACGTC  | acquirer clones affiliated to unclassified Bacteria                                                                                                                                        |                               |                     |
| <b>OP3cIn2</b>     | GTAACGCCTGCCACCTCCGT  | acquirer clones affiliated to unclassified Bacteria                                                                                                                                        |                               |                     |
| <b>OP3cIn6</b>     | CTGGCCCCGCTTTTTTGAGA  | acquirer clones affiliated to unclassified Bacteria                                                                                                                                        |                               |                     |
| <b>OP5cIn4</b>     | GCAACTCCATCTTCACGAGG  | acquirer clones affiliated to unclassified Bacteria (with closest relatives affiliated to Caldiseriaceae )                                                                                 |                               |                     |
| <b>patulbcIn</b>   | GGAGTAAGCCGAGACTTCCT  | acquirer clones affiliated to unclassified Bacteria (with closest relatives affiliated to Actinobacteria)                                                                                  |                               |                     |
| <b>PelocIn3</b>    | TAGCCAGAACCTTTTCTTCC  | acquirer clones affiliated to Pelomonas; Pelomonas saccharophila, Pelomonas puraquae, Pelomonas aquatica, Advenella mimigardefordensis, Alcaligenes monasteriensis, Advenella kashmirensis | Comamonadaceae/Alcaligenaceae | Betaproteobacteria  |
| <b>pirelcIn</b>    | AGCGAGGTCGTGCTCTCACA  | acquirer clones affiliated to unclassified Bacteria (with closest relatives affiliated to Pasteuria)                                                                                       |                               |                     |
| <b>PolarcIn</b>    | ACTCGTCGGCTTAACCCGTT  | acquirer clones affiliated to Polaromonas; Polaromonas naphthalenivorans; Polaromonas hydrogenivorans                                                                                      | Comamonadaceae                | Betaproteobacteria  |
| <b>Psdonoca</b>    | CGAACTCCAGTCATGCCCGT  | Pseudonocardia spp. (P. hydrocarbonoxydans, P. sulfidoxydans, P. benzenivorans, P. oroxyli, P. ailaonensis, P. petroleophila)                                                              | Pseudonocardiaceae            | Actinobacteria      |
| <b>PsenocIn2</b>   | CCCCTACCGTCCAAATTCGT  | ETBE-enrichment clones affiliated to Pseudonocardia                                                                                                                                        | Pseudonocardiaceae            | Actinobacteria      |
| <b>RalstcIn2</b>   | GTGTCCACTTTCCCTTTTCGG | acquirer clones affiliated to Cupriavidus; several Cupriavidus spp., Ralstonia spp., Wautersia spp.                                                                                        | Burkholderiaceae              | Betaproteobacteria  |
| <b>Rhodaeth1</b>   | CTTTCCCAAGCTTATCCCCA  | Rhodococcus aetherivorans                                                                                                                                                                  | Nocardiaceae                  | Actinobacteria      |
| <b>RhodocIn3</b>   | ACCCAACAACCAAGTGACAT  | acquirer clones affiliated to Rhodoferax                                                                                                                                                   | Comamonadaceae                | Betaproteobacteria  |
| <b>RhodofcIn</b>   | CGAGGCCCATGCTGAGTCC   | acquirer clones affiliated to Comamonadaceae                                                                                                                                               | Comamonadaceae                | Betaproteobacteria  |
| <b>Rhodrub</b>     | TGCGAGTCCCCAACCGAATT  | Rhodococcus ruber, Rhodococcus aetherivorans, Rhodococcus rhodochrous, Rhodococcus artemisiae                                                                                              | Nocardiaceae                  | Actinobacteria      |
| <b>rhodtercIn2</b> | GGGCTTCCTCTGGGCATACT  | acquirer clones affiliated to Nitrospira                                                                                                                                                   |                               | Nitrospira          |
| <b>rubritcIn</b>   | TAGCTCACACGTCTCAAACG  | acquirer clones affiliated to Acetobacteraceae                                                                                                                                             | Acetobacteraceae              | Alphaproteobacteria |
| <b>smitcIn</b>     | CCGATCGCCGAAGAAATCGG  | acquirer clones affiliated to Syntrophaceae                                                                                                                                                | Syntrophaceae                 | Deltaproteobacteria |
| <b>sphincln</b>    | CAATACCAGTCCAGTCAGCC  | acquirer clones affiliated to Sphingomonas                                                                                                                                                 | Sphingomonadaceae             | Alphaproteobacteria |
| <b>stenocIn</b>    | ATCAGCGCCAGGCCATTGCT  | acquirer clones affiliated to Pseudoxanthomonas; Pseudoxanthomonas spadix                                                                                                                  | Xanthomonadaceae              | Gammaproteobacteria |
| <b>sulfurcIn</b>   | ATGCCTCAAGACCCCCAGTT  | acquirer clones affiliated to unclassified Bacteria (with closest relatives affiliated to Sulfuricurvum)                                                                                   |                               |                     |
| <b>Syncln1</b>     | GCAATCAATTTTCCGGGTGT  | acquirer clones affiliated to Syntrophaceae; Syntrophus gentianae, Syntrophus buswellii, Syntrophus aciditrophicus                                                                         | Syntrophaceae                 | Deltaproteobacteria |
| <b>thermanacln</b> | TCACCGCCCCACCTTCTTT   | acquirer clones affiliated to unclassified Bacteria (with closest relatives affiliated to Thermoanaerobacteraceae)                                                                         |                               |                     |
| <b>thermcIn</b>    | GGCCGTCTCTCATTCCCTGT  | acquirer clones affiliated to Dehalogenimonas                                                                                                                                              | Dehalococcoidia               | Chloroflexi         |

|                    |                      |                                                                                                                                                                      |                 |                    |
|--------------------|----------------------|----------------------------------------------------------------------------------------------------------------------------------------------------------------------|-----------------|--------------------|
| <b>trepncln</b>    | AAGCATCCGCCCCAGCACCT | aquifer clones affiliated to Treponema ETBE-, TBA- and BTEX-enrichment clones affiliated to Acidovorax; Acidovorax soli, Acidovorax defluvii, Acidovorax delafieldii | Spirochaetaceae | Spirochaetes       |
| <b>VarAcidcln1</b> | CTCCGTTATCCCCACTCTC  |                                                                                                                                                                      | Comamonadaceae  | Betaproteobacteria |
| <b>Varcln3</b>     | GGCCCATCTTCGTCCGGCGC | aquifer clones affiliated to Treponema                                                                                                                               | Spirochaetaceae | Spirochaetes       |
| <b>Varvpara1</b>   | GGTATTAGCACAGCTTCGCT | Variovorax paradoxus                                                                                                                                                 | Comamonadaceae  | Betaproteobacteria |
| <b>verrucomcln</b> | GTCCTTACCGACTTGGCCG  | aquifer clones affiliated to unclassified Bacteria (with closest relatives affiliated to Verrucomicrobiaceae)                                                        |                 |                    |
