# Supplementary material
Source: MDPI journal article supplement (https://www.mdpi.com/2076-3417/9/20/4247)

**Figure S4**

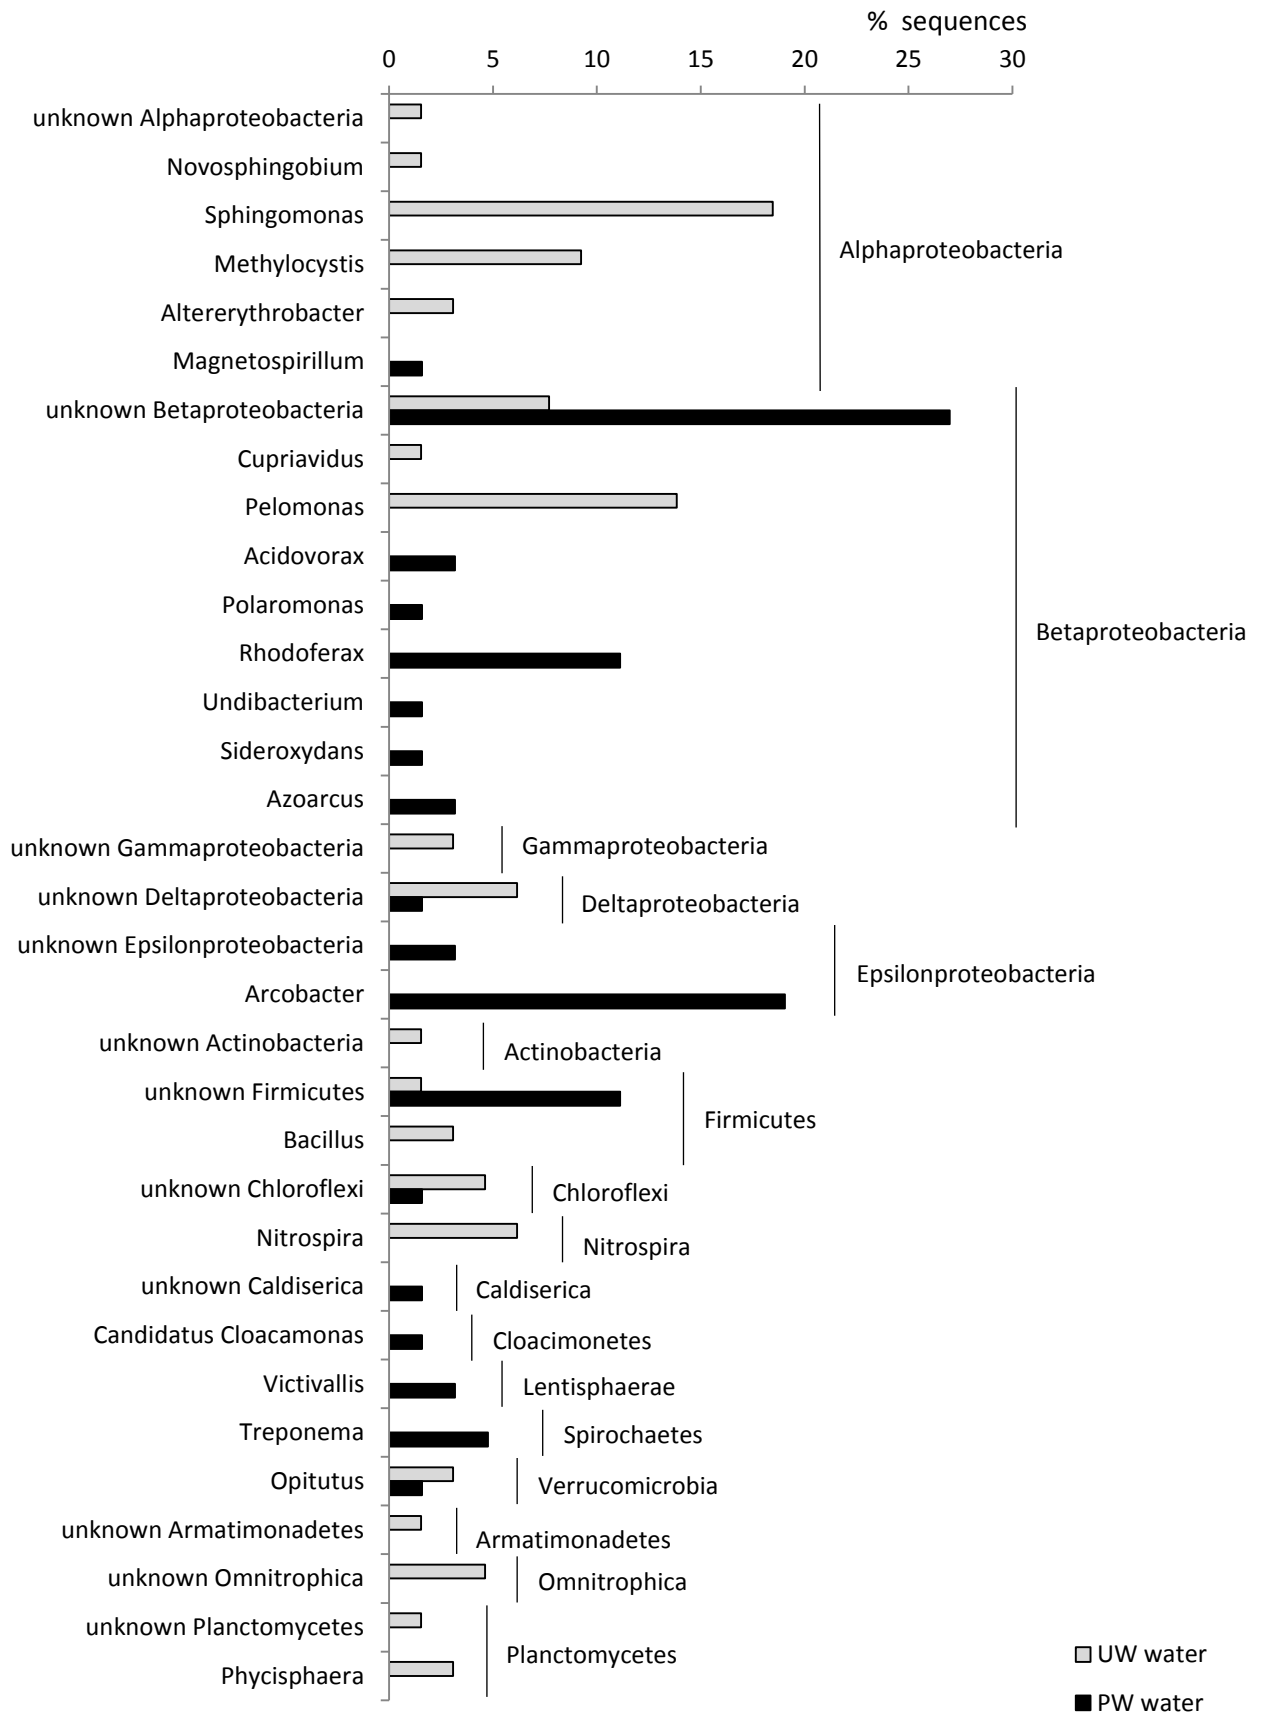

Supplement: s1 [file s1]
